# Supplementary material for: Evolutionary Adaptation of Protein Turnover in White Muscle of Stenothermal Antarctic Fish: Elevated Cold Compensation at Reduced Thermal Responsiveness
Source: MDPI journal article supplement (doi:10.3390/biom13101507), 2023-10-11
Supplement: s1 [file s1]

# Supplementary Materials:

**Table S1.** Q<sub>10</sub> values of cathepsin D activity in muscle homogenates at various temperatures in *P. brachycephalum*. For the Q<sub>10</sub> calculation, the slope of cathepsin D activity at several temperature steps ( $\Delta T = 19^\circ\text{C}$ ) was determined for samples from 6 individuals at different temperatures (0, 4, and 10 °C).

| Acclimation Temperature | Q <sub>10</sub> |
|-------------------------|-----------------|
| 0°C                     | 2.54            |
| 0°C                     | 2.88            |
| 4°C                     | 1.95            |
| 4°C                     | 2.06            |
| 10°C                    | 2.15            |
| 10°C                    | 2.05            |
| Average                 | 2.27 ± 0.33     |

**Table S2.** SAM analysis comparison between metabolic profiles of *P. brachycephalum* and *Z. viviparus*. It describes the results of the SAM (Delta value 5.7, FDR 0.003, False 0.13) comparing *P. brachycephalum* and *Z. viviparus* at 4°C and 10°C.

| Metabolite       | d.value | stdev     | rawp       | q.value    |
|------------------|---------|-----------|------------|------------|
| Alanine          | 54.298  | 0.020949  | 0          | 0          |
| Asparagine       | 34.678  | 0.0344    | 0          | 0          |
| Glycine          | 34.124  | 0.035371  | 0          | 0          |
| Tyrosine         | 29.339  | 0.039696  | 0          | 0          |
| Trimethylamine   | 27.177  | 0.083969  | 0          | 0          |
| Tryptophan       | 26.941  | 0.020915  | 0          | 0          |
| Leucine          | 26.763  | 0.054808  | 0          | 0          |
| Isoleucine       | 26.728  | 0.069668  | 0          | 0          |
| Valine           | 24.481  | 0.065498  | 0          | 0          |
| Choline          | 22.99   | 0.017189  | 0          | 0          |
| Taurine          | 22.532  | 0.01147   | 0          | 0          |
| Dimethylamine    | 17.399  | 0.17601   | 0          | 0          |
| TMAO             | 15.119  | 0.049399  | 0          | 0          |
| Serine           | 13.897  | 0.0079914 | 0          | 0          |
| Glutamine        | 13.67   | 0.0074317 | 0          | 0          |
| O-Phosphocholine | 13.307  | 0.027079  | 0          | 0          |
| Methionine       | 12.91   | 0.076114  | 0          | 0          |
| Lysine           | 9.4739  | 0.034614  | 0          | 0          |
| Hypotaurine      | 8.3763  | 0.045886  | 0.00022222 | 0.00025571 |
| O-Acetylcholine  | 7.7886  | 0.024056  | 0.00044444 | 0.00044169 |
| Fumarate         | 7.5165  | 0.012557  | 0.00044444 | 0.00044169 |
| Histamine        | 7.4313  | 0.025264  | 0.00044444 | 0.00044169 |
| Histidine        | 6.6808  | 0.043659  | 0.0028889  | 0.0025265  |

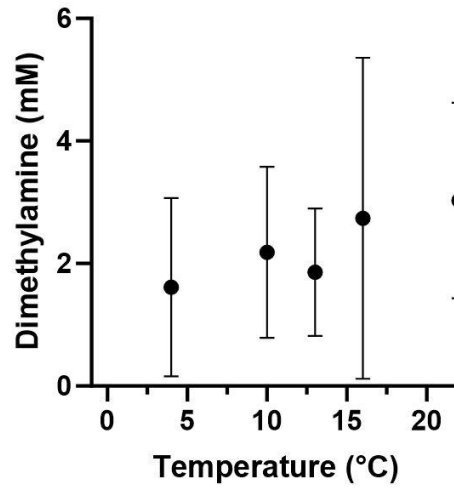

**Figure S1.** Changes of the concentration of dimethylamine during acute warming in *Zoarces viviparus*. Dimethylamine is not increasing significantly (significant difference using Significance Analyses of Microarray SAM (Delta value 0.5, FDR 0.188, False 0.46, (4 °C (n = 5), 10 °C (n = 6), 13 °C (n = 6), 16 °C (n = 4) and 22 °C (n = 4))).

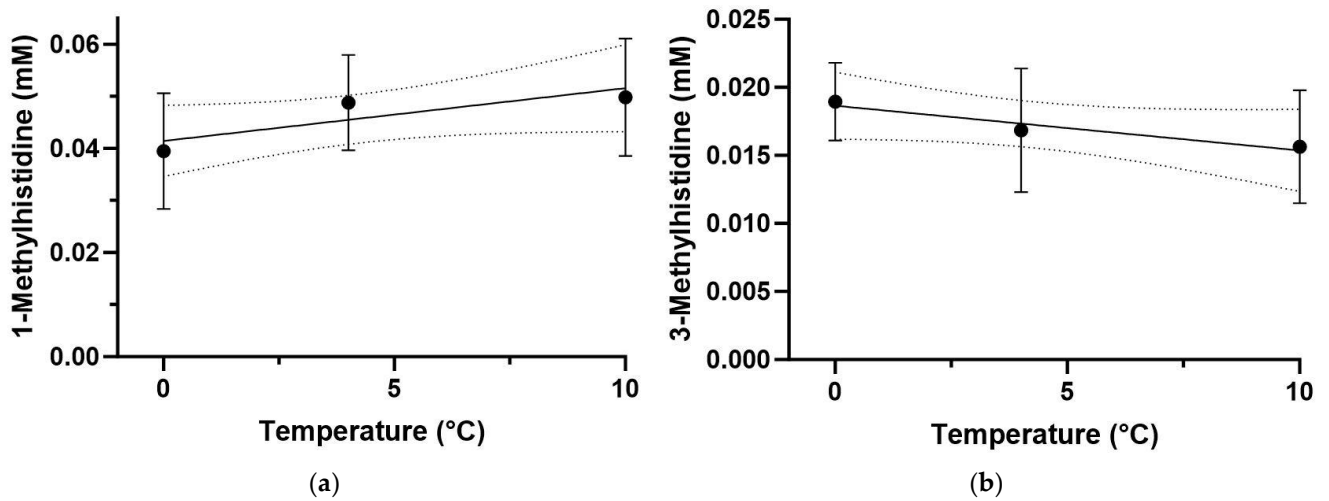

**Figure S2.** Changes of the concentration of 1-Methylhistidine and 3-Methylhistidine during acute warming in *Pachycara brachycephalum*. Neither 1-Methylhistidine ( $Y = 0,001013x + 0,04142$ ,  $R^2 = 0.137$ ,  $p\text{-value} < 0.05$ ) nor 3-Methylhistidine ( $Y = -0,0003283x + 0,01865$ ,  $R^2 = 0.113$ ,  $p\text{-value} < 0.05$ ) changed significantly during acute warming.
